# Supplementary material for: Diagnostic approach in adult-onset neurometabolic diseases
Source: HighWire-hosted journal article supplement (doi:10.1136/jnnp-2021-328045), 2022-02-09
Supplement: jnnp-2021-328045supp002_data_supplement.pdf [file jnnp-2021-328045supp002_data_supplement.pdf]

Supplementary material 2: List of references for Figure 1 and Table 1.

|                                                                                        |                                                                                                                                                                                             |
|----------------------------------------------------------------------------------------|---------------------------------------------------------------------------------------------------------------------------------------------------------------------------------------------|
| <b>Neurotransmitter synthesis deficiency</b>                                           |                                                                                                                                                                                             |
| AD GTP-CH1 deficiency                                                                  | Wijemanne 2015; Trender-Gerhard 2009; Hyland 2008 [1–3]                                                                                                                                     |
| <b>Aminoacidopathies</b>                                                               |                                                                                                                                                                                             |
| Cerebral organic acidurias                                                             | Gelener 2020; Tabarestani 2020; Mainka 2020; Tsai 2017; Pierson 2015; Herskovitz 2013; Marcel 2012; Karatas 2010; Angle 2008; Periasamy 2008; Kulkens 2005; Bahr 2002; Fujitake 1999 [4–16] |
| Phenylketonuria                                                                        | Chen 2019; Wang 2018; Tufekcioglu 2016; Rosini 2014; Vockley 2014; Bilder 2013; Kasim 2001 [17–23]                                                                                          |
| Urea cycle disorders                                                                   | Anderson 2020; Koya 2019; Panza 2019; Bigot 2017; Maillot 2016; Anstey 2015; Atiq 2008; Maillot 2007; Tuchman 2001 [24–32]                                                                  |
| Genetic hyperhomocystinemia : MTHFR or Cobalamin metabolism defects and CBS deficiency | Marelli 2021; Vieira 2020; Wei 2020; Weber Hoss 2019; Gales 2018; Morris 2017; Norris 2017; Stabler 2013; Michot 2008; Kelly 2003; Powers 2001 [33-43]                                      |
| <b>Lysosomal storage disorders</b>                                                     |                                                                                                                                                                                             |
| Niemann Pick-C                                                                         | Sitarska et Lugowska 2019; Nadjar 2018; Lazzaro 2016; Maubert 2013 [44–47]                                                                                                                  |
| Gaucher III                                                                            | Leurs 2018; El-Beshlawy 2017; Stirnemann 2017; Mistry 2015; Grabowski 2015; Ben Rhouma 2012; Vellodi 2009; Guimaraes 2002; Charrow 1998; Neil 1979 [48–57]                                  |
| Krabbe                                                                                 | Xia 2020; Cousyn 2019; Zhang 2018; Escolar 2017; Liao 2017; Adachi 2016; Debs 2013 [58–64]                                                                                                  |
| Metachromatic leukodystrophy                                                           | Van Rappard 2015; Hahn 1982 [65,66]                                                                                                                                                         |
| Fabry                                                                                  | Ortiz 2018; Curiati 2017; Smid 2015; Ghali 2012; Hegemann 2006 [67–71]                                                                                                                      |
| Pompe                                                                                  | Hossain 2018; Chan 2016; Young 2003; Umapathysivam 2001 [72–75]                                                                                                                             |

|                                                       |                                                                                                                                                              |
|-------------------------------------------------------|--------------------------------------------------------------------------------------------------------------------------------------------------------------|
| <b>Peroxisomal disorders</b>                          |                                                                                                                                                              |
| X-ALD                                                 | Rattay 2020; Mannari 2020; Shamim 2017 [76–78]                                                                                                               |
| Refsum                                                | Stepien 2016; Bompaire 2015; Wanders 2011; Britton 1989 [79–82]                                                                                              |
| AMACR deficiency                                      | Smith 2010; Kapina 2010; Clarke 2004; McLean 2002; Ferdinandusse 2000 [83–87]                                                                                |
| <b>Disorders of vitamin metabolism</b>                |                                                                                                                                                              |
| Pyridoxine-dependent epilepsy                         | Osman 2020; Xue 2019 [88,89]                                                                                                                                 |
| Biotinidase deficiency                                | Radelfahr 2020; Van Winckel 2020; Van Iseghem 2019; Wolf 2019; Deschamps 2018; Yilmaz 2017; Bottin 2015; Cowan 2010 [90–97]                                  |
| Abetalipoproteinemia                                  | Lee 2014; Nagappa 2014; Zamel 2008 [98–100]                                                                                                                  |
| AVED                                                  | El Euch-Fayache 2014; Cavalier 1998; Finckh 1995; Gotoda 1995 [101–104]                                                                                      |
| Cerebral folate deficiency                            | Pope 2019; Masingue 2019; Sadighi 2012 [105–107]                                                                                                             |
| TBRBGD                                                | Tabarki 2013; Kono 2009 [108,109]                                                                                                                            |
| Riboflavin transporter deficiency                     | Carreau 2020; Foley 2014 [110,111]                                                                                                                           |
| <b>Disorders of energy metabolism</b>                 |                                                                                                                                                              |
| GLUT 1                                                | Leen 2013; Afawi 2010; Veggiotti 2010 [112–114]                                                                                                              |
| PDC deficiency, Coenzyme Q10 deficiency               | Pavlu-Pereira 2020; Rahman 2012; Sedel 2008; Quinzii 2007; Mellick 2004; Ogasahara 1989 [115–120]                                                            |
| LHON                                                  | Ciron 2018; Carelli 2017; Martikainen 2016; Pfeffer 2013; Palace 2009; McFarland 2007; Gilhuis 2006; Horvath 2000; Nikoskelainen 1995 [121–129]              |
| Disorders of beta-oxidation: MADD, MCAD and MTP/LCHAD | Nadjar 2020; Chen 2019; De Biase 2017; Wang 2016; Grunert 2014; Rosenbohm 2014; Liewluck 2013; Schatz 2010; Lang 2009; Abdenur 2001; Van Hove 1993 [130–140] |
| <b>Metal toxicity</b>                                 |                                                                                                                                                              |

|                              |                                                                                    |
|------------------------------|------------------------------------------------------------------------------------|
| Wilson                       | Yong 2019; Guillaud 2018; Bandmann 2015; Roberts 2008; Ferenci 2007 [141–145]      |
| Aceruleoplasminemia          | Marchi 2019; Kono 2012 [146,147]                                                   |
| SLC30A10 deficiency          | Quadri 2012; Tuschl 2012; Gospe 2000 [148–150]                                     |
| <b>Others</b>                |                                                                                    |
| CTX                          | Makary 2018; Sasamura 2018; Degos 2016; Nakashima 1994; Leitersdorf 1993 [151–155] |
| Acute intermittent porphyria | Simon 2018; Kevelam 2016; Bonkovsky 2014; Hervé 2010 [156–159]                     |
| Tangier                      | Hooper 2020; Mercan 2018 [160,161]                                                 |

## References

- 1 Wijemanne S, Jankovic J. Dopa-responsive dystonia - Clinical and genetic heterogeneity. *Nat Rev Neurol* 2015;**11**:414–24. doi:10.1038/nrneurol.2015.86
- 2 Trender-Gerhard I, Sweeney MG, Schwingenschuh P, *et al.* Autosomal-dominant GTPCH1-deficient DRD: Clinical characteristics and long-term outcome of 34 patients. *J Neurol Neurosurg Psychiatry* 2009;**80**:839–45. doi:10.1136/jnnp.2008.155861
- 3 Hyland K. Clinical Utility of Monoamine Neurotransmitter Metabolite Analysis in Cerebrospinal Fluid. *Clin Chem* 2008;**54**:633–41. doi:10.1373/clinchem.2007.099986
- 4 Gelener P, Severino M, Diker S, *et al.* Adult-onset glutaric aciduria type I: rare presentation of a treatable disorder. *neurogenetics* 2020 213 2020;**21**:179–86. doi:10.1007/S10048-020-00610-9
- 5 Tabarestani S, Varriano B, Rawal S, *et al.* Seizures and early onset dementia: D2HGA1 inborn error of metabolism in adults. *Ann Clin Transl Neurol* 2020;**7**:2052. doi:10.1002/ACN3.51162
- 6 Kùlkens S, Harting I, Sauer S, *et al.* Late-onset neurologic disease in glutaryl-CoA dehydrogenase deficiency. *Neurology* 2005;**64**:2142–4. doi:10.1212/01.WNL.0000167428.12417.B2
- 7 Bähr O, Mader I, Zschocke J, *et al.* Adult onset glutaric aciduria type I presenting with a leukoencephalopathy. *Neurology* 2002;**59**:1802–4. doi:10.1212/01.WNL.0000036616.11962.3C
- 8 Fujitake J, Ishikawa Y, Fujii H, *et al.* L-2-Hydroxyglutaric aciduria: two Japanese adult cases in one family. *J Neurol* 1999 2465 1999;**246**:378–82. doi:10.1007/S004150050367
- 9 Mainka T, Ziagaki A, Koning TJ de, *et al.* The Wide Phenotypic Spectrum of L-2 Hydroxyglutaric Aciduria in Adults. *Mov Disord Clin Pract* 2020;**7**:1004–6. doi:10.1002/MDC3.13092

- 10 Tsai FC, Lee HJ, Wang AG, *et al.* Experiences during newborn screening for glutaric aciduria type 1: Diagnosis, treatment, genotype, phenotype, and outcomes. *J Chinese Med Assoc* 2017;**80**:253–61. doi:10.1016/J.JCMA.2016.07.006
- 11 Pierson TM, Nezhad M, Tremblay MA, *et al.* Adult-onset glutaric aciduria type I presenting with white matter abnormalities and subependymal nodules. *Neurogenetics* 2015;**16**:325–8. doi:10.1007/s10048-015-0456-y
- 12 Herskovitz M, Goldsher D, Sela B-A, *et al.* Subependymal mass lesions and peripheral polyneuropathy in adult-onset glutaric aciduria type I. *Neurology* 2013;**81**:849–50. doi:10.1212/WNL.0B013E3182A2CBF2
- 13 Marcel C, Mallaret M, Lagha-Boukbiza O, *et al.* L-2-hydroxyglutaric aciduria diagnosed in a young adult with progressive cerebellar ataxia and facial dyskinesia. *Rev Neurol (Paris)* 2012;**168**:187–91. doi:10.1016/J.NEUROL.2011.06.002
- 14 Karatas H, Saygi S, Bastan B, *et al.* L-2-hydroxyglutaric aciduria: Report of four Turkish adult patients. *Neurologist* 2010;**16**:44–6. doi:10.1097/NRL.0B013E31819F9556
- 15 Angle B, Burton BK. Risk of sudden death and acute life-threatening events in patients with glutaric acidemia type II. *Mol Genet Metab* 2008;**93**:36–9. doi:10.1016/j.ymgme.2007.09.015
- 16 Periasamy V, Rudwan M, Yadav G, *et al.* Epilepsy in a Young Adult Caused by L-2-Hydroxyglutaric Aciduria: A Case Report. *Med Princ Pract* 2008;**17**:258–61. doi:10.1159/000117804
- 17 Chen S, Zhu M, Hao Y, *et al.* Effect of Delayed Diagnosis of Phenylketonuria With Imaging Findings of Bilateral Diffuse Symmetric White Matter Lesions: A Case Report and Literature Review. *Front Neurol* 2019;**0**:1040. doi:10.3389/FNEUR.2019.01040
- 18 Wang C, Li J. Subacute onset leukodystrophy and visual-spatial disorders revealing phenylketonuria combined with homocysteinemia in adulthood. *Med (United States)* 2018;**97**:1–5. doi:10.1097/MD.00000000000009801
- 19 Tufekcioglu Z, Cakar A, Bilgic B, *et al.* Adult-onset phenylketonuria with rapidly progressive dementia and parkinsonism. *Neurocase* 2016;**22**:273–5. doi:10.1080/13554794.2016.1142567
- 20 Rosini F, Rufa A, Monti L, *et al.* Adult-onset phenylketonuria revealed by acute reversible dementia, prosopagnosia and parkinsonism. *J. Neurol.* 2014;**261**:2446–8. doi:10.1007/s00415-014-7492-7
- 21 Vockley J, Andersson HC, Antshel KM, *et al.* Phenylalanine hydroxylase deficiency: Diagnosis and management guideline. *Genet Med* 2014;**16**:188–200. doi:10.1038/gim.2013.157
- 22 Bilder DA, Burton BK, Coon H, *et al.* Psychiatric symptoms in adults with phenylketonuria. *Mol Genet Metab* 2013;**108**:155–60. doi:10.1016/J.YMGME.2012.12.006
- 23 Kasim S, Moo LR, Zschocke J, *et al.* Phenylketonuria presenting in adulthood as progressive spastic paraparesis with dementia. *J Neurol Neurosurg Psychiatry* 2001;**71**:795–7. doi:10.1136/JNNP.71.6.795
- 24 Anderson D, Jain-Ghai S, Sligl WI. Adult-onset presentation of a urea cycle disorder

- necessitating intensive care unit admission. *Can J Anesth Can d'anesthésie* 2020;678:2020;67:1094–6. doi:10.1007/S12630-020-01618-3
- 25 Koya Y, Shibata M, Senju M, *et al.* Hyperammonemia in a woman with late-onset ornithine transcarbamylase deficiency. *Intern Med* 2019;58:937–42. doi:10.2169/internalmedicine.1851-18
- 26 Panza E, Martinelli D, Magini P, *et al.* Hereditary Spastic Paraplegia Is a Common Phenotypic Finding in ARG1 Deficiency, P5CS Deficiency and HHH Syndrome: Three Inborn Errors of Metabolism Caused by Alteration of an Interconnected Pathway of Glutamate and Urea Cycle Metabolism. *Front Neurol* 2019;10:131. doi:10.3389/FNEUR.2019.00131
- 27 Bigot A, Brunault P, Lavigne C, *et al.* Psychiatric adult-onset of urea cycle disorders : A case-series. *Mol Genet Metab Reports* 2017;12:103–9. doi:10.1016/j.ymgmr.2017.07.001
- 28 Maillot F, Blasco H, Lioger B, *et al.* Diagnostic et traitement des déficits du cycle de l'urée à l'âge adulte. *La Rev Médecine Interne* 2016;37:680–4. doi:10.1016/J.REVMED.2016.02.011
- 29 Anstey JR, Haydon TP, Ghanpur RB, *et al.* Initial presentation of a urea cycle disorder in adulthood: an under-recognised cause of severe neurological dysfunction. *Med J Aust* 2015;203:445–7. doi:10.5694/MJA15.00510
- 30 Atiq M, Holt AF, Safdar K, *et al.* Adult onset urea cycle disorder in a patient with presumed hepatic encephalopathy. *J Clin Gastroenterol* 2008;42:213–4. doi:10.1097/O1.mcg.0000225628.84168.25
- 31 Maillot F, Crenn P. Maladies métaboliques Les déficits du cycle de l' urée chez les patients adultes. 2007;:897–903.
- 32 Tuchman M, Ahrens M, Barsotti R, *et al.* Consensus statement from a conference for the management of patients with urea cycle disorders. *J Pediatr* 2001;138:S1–5. doi:10.1067/mpd.2001.111830
- 33 Marelli C, Lavigne C, Stepien KM, *et al.* Clinical and molecular characterization of adult patients with late-onset MTHFR deficiency. *J Inherit Metab Dis* 2021;44:777–86. doi:10.1002/JIMD.12323
- 34 Vieira D, Florindo C, Almeida IT de, *et al.* Adult-onset methylenetetrahydrofolate reductase deficiency. *BMJ Case Reports CP* 2020;13:e232241. doi:10.1136/BCR-2019-232241
- 35 Powers JM, Rosenblatt DS, Schmidt RE, *et al.* Neurological and neuropathologic heterogeneity in two brothers with cobalamin C deficiency. *Ann Neurol* 2001;49:396–400. doi:10.1002/ana.78
- 36 Wei Y, Guan Y, Hao H. Late-onset cobalamin C disease presenting with acute progressive polyneuropathy. *Muscle Nerve* 2020;61:E37–40. doi:10.1002/MUS.26865
- 37 Hoss GRW, Poloni S, Blom HJ, *et al.* Three Main Causes of Homocystinuria: CBS, cblC and MTHFR Deficiency. What do they Have in Common? *J Inborn Errors Metab Screen* 2019;7. doi:10.1590/2326-4594-jiems-2019-0007
- 38 Gales A, Masingue M, Millecamps S, *et al.* Adolescence/adult onset MTHFR deficiency may manifest as isolated and treatable distinct neuro-psychiatric

- syndromes. *Orphanet J Rare Dis* 2018;**13**:1–8. doi:10.1186/s13023-018-0767-9
- 39 Morris AAM, Kožich V, Santra S, *et al.* Guidelines for the diagnosis and management of cystathionine beta-synthase deficiency. *J. Inherit. Metab. Dis.* 2017;**40**:49–74. doi:10.1007/s10545-016-9979-0
- 40 Norris SA, Pogarcic A, Hicks M, *et al.* Adult-onset dystonia with marfanoid features. *Neurol Clin Pract* 2017;**7**:e31–4. doi:10.1212/CPJ.0000000000000297
- 41 Stabler SP, Korson M, Jethva R, *et al.* Metabolic profiling of total homocysteine and related compounds in hyperhomocysteinemia: Utility and limitations in diagnosing the cause of puzzling thrombophilia in a family. In: *JIMD Reports*. Springer 2013. 149–63. doi:10.1007/8904\_2013\_235
- 42 Michot JM, Sedel F, Giraudier S, *et al.* Psychosis, paraplegia and coma revealing methylenetetrahydrofolate reductase deficiency in a 56-year-old woman. *J. Neurol. Neurosurg. Psychiatry.* 2008;**79**:963–4. doi:10.1136/jnnp.2008.143677
- 43 Kelly PJ, Furie KL, Kistler JP, *et al.* Stroke in young patients with hyperhomocysteinemia due to cystathionine beta-synthase deficiency. *Neurology* 2003;**60**:275–9. doi:10.1212/01.WNL.0000042479.55406.B3
- 44 Sitarska D, Ługowska A. Laboratory diagnosis of the Niemann-Pick type C disease: an inherited neurodegenerative disorder of cholesterol metabolism. *Metab. Brain Dis.* 2019;**34**:1253–60. doi:10.1007/s11011-019-00445-w
- 45 Nadjar Y, Hütter-Moncada AL, Latour P, *et al.* Adult Niemann-Pick disease type C in France: Clinical phenotypes and long-term miglustat treatment effect 11 Medical and Health Sciences 1103 Clinical Sciences. *Orphanet J Rare Dis* 2018;**13**. doi:10.1186/s13023-018-0913-4
- 46 Di Lazzaro V, Marano M, Florio L, *et al.* Niemann–Pick type C: focus on the adolescent/adult onset form. *Int. J. Neurosci.* 2016;**126**:963–71. doi:10.3109/00207454.2016.1161623
- 47 Maubert A, Hanon C, Metton JP. Maladie de Niemann-Pick de type C chez l’adulte et troubles psychiatriques : revue de littérature. *Encephale* 2013;**39**:315–9. doi:10.1016/J.ENCEP.2013.04.013
- 48 Leurs A, Chepy A, Detonellaere C, *et al.* Maladie de Gaucher de type 3, une maladie également de l’adulte ? *La Rev Médecine Interne* 2018;**39**:589–93. doi:10.1016/J.REVMED.2018.03.005
- 49 El-Beshlawy A, Tyłki-Szymanska A, Vellodi A, *et al.* Long-term hematological, visceral, and growth outcomes in children with Gaucher disease type 3 treated with imiglucerase in the International Collaborative Gaucher Group Gaucher Registry. *Mol Genet Metab* 2017;**120**:47–56. doi:10.1016/J.YMGME.2016.12.001
- 50 Stirnemann JÖ, Belmatoug N, Camou F, *et al.* A review of gaucher disease pathophysiology, clinical presentation and treatments. *Int J Mol Sci* 2017;**18**:1–30. doi:10.3390/ijms18020441
- 51 Mistry PK, Belmatoug N, Dahl S vom, *et al.* Understanding the natural history of Gaucher disease. *Am J Hematol* 2015;**90**:S6–11. doi:10.1002/AJH.24055
- 52 Grabowski GA, Zimran A, Ida H. Gaucher disease types 1 and 3: Phenotypic characterization of large populations from the ICGG Gaucher Registry. *Am J Hematol* 2015;**90**:S12–8. doi:10.1002/AJH.24063

- 53 Ben Rhouma F, Kallel F, Kefi R, *et al.* Adult gaucher disease in southern Tunisia: report of three cases. *Diagnostic Pathol* 2012;71:2012;7:1–4. doi:10.1186/1746-1596-7-4
- 54 Vellodi A, Tylki-Szymanska A, Davies EH, *et al.* Management of neuronopathic Gaucher disease: Revised recommendations. *J Inherit Metab Dis* 2009;32:660–4. doi:10.1007/S10545-009-1164-2
- 55 Guimarães J, Amaral O, Miranda MCS. Adult-onset neuronopathic form of Gaucher's disease: a case report. *Parkinsonism Relat Disord* 2003;9:261–4. doi:10.1016/S1353-8020(02)00096-2
- 56 Charrow J, Esplin JA, Gribble TJ, *et al.* Gaucher disease: Recommendations on diagnosis, evaluation, and monitoring. *Arch. Intern. Med.* 1998;158:1754–60. doi:10.1001/archinte.158.16.1754
- 57 Neil JF, Glew RH, Peters SP. Familial Psychosis and Diverse Neurologic Abnormalities in Adult-Onset Gaucher's Disease. *Arch Neurol* 1979;36:95–9. doi:10.1001/ARCHNEUR.1979.00500380065007
- 58 Xia Z, Wenwen Y, Xianfeng Y, *et al.* Adult-onset Krabbe disease due to a homozygous GALC mutation without abnormal signals on an MRI in a consanguineous family: A case report. *Mol Genet Genomic Med* 2020;8:1–7. doi:10.1002/mgg3.1407
- 59 Cousyn L, Law-Ye B, Pyatigorskaya N, *et al.* Brain MRI features and scoring of leukodystrophy in adult-onset Krabbe disease. *Neurology* 2019;93:E647–52. doi:10.1212/WNL.0000000000007943
- 60 Zhang T, Yan C, Ji K, *et al.* Adult-onset Krabbe disease in two generations of a Chinese family. *Ann Transl Med* 2018;6:174–174. doi:10.21037/atm.2018.04.30
- 61 Escolar ML, Kiely BT, Shawgo E, *et al.* Psychosine, a marker of Krabbe phenotype and treatment effect. *Mol Genet Metab* 2017;121:271–8. doi:10.1016/j.ymgme.2017.05.015
- 62 Liao H-C, Spacil Z, Ghomashchi F, *et al.* Lymphocyte Galactocerebrosidase Activity by LC-MS/MS for Post-Newborn Screening Evaluation of Krabbe Disease. *Clin Chem* 2017;63:1363–9. doi:10.1373/clinchem.2016.264952
- 63 Adachi H, Ishihara K, Tachibana H, *et al.* Adult-onset Krabbe disease presenting with an isolated form of peripheral neuropathy. *Muscle Nerve* 2016;54:152–7. doi:10.1002/MUS.25067
- 64 Debs R, Froissart R, Aubourg P, *et al.* Krabbe disease in adults: phenotypic and genotypic update from a series of 11 cases and a review. *J Inherit Metab Dis* 2013;36:859–68. doi:10.1007/S10545-012-9560-4
- 65 Rappard DF Van, Boelens JJ, Pediatric C, *et al.* Best Practice & Research Clinical Endocrinology & Metabolism Metachromatic leukodystrophy : Disease spectrum and approaches for treatment. *Best Pract Res Clin Endocrinol Metab* 2014;31. doi:10.1016/j.beem.2014.10.001
- 66 Hahn AF, Gordon BA, Feleki V, *et al.* A variant form of metachromatic leukodystrophy without arylsulfatase deficiency. *Ann Neurol* 1982;12:33–6. doi:10.1002/ana.410120106
- 67 Ortiz A, Germain DP, Desnick RJ, *et al.* Fabry disease revisited: Management and

- treatment recommendations for adult patients. *Mol Genet Metab* 2018;**123**:416–27. doi:10.1016/j.ymgme.2018.02.014
- 68 Curiati MA, Aranda CS, Kyosen SO, *et al.* The Challenge of Diagnosis and Indication for Treatment in Fabry Disease. *J Inborn Errors Metab Screen* 2017;**5**:232640981668573. doi:10.1177/2326409816685735
- 69 Smid BE, Van der Tol L, Biegstraaten M, *et al.* Plasma globotriaosylsphingosine in relation to phenotypes of fabry disease. *J Med Genet* 2015;**52**:262–8. doi:10.1136/jmedgenet-2014-102872
- 70 Ghali J, Murugasu A, Day T, *et al.* Carpal Tunnel Syndrome in Fabry Disease. *JIMD Rep* 2011;**2**:17–23. doi:10.1007/8904\_2011\_37
- 71 Hegemann S, Hajjioff D, Conti G, *et al.* Hearing loss in Fabry disease: data from the Fabry Outcome Survey. *Eur J Clin Invest* 2006;**36**:654–62. doi:10.1111/J.1365-2362.2006.01702.X
- 72 Hossain A. ARTICLE IN PRESS A Case of Adult-onset Pompe Disease with Cerebral Stroke and Left Ventricular Hypertrophy D5X X Keiko. *J Stroke Cerebrovasc Dis* 2018;:1–7. doi:10.1016/j.jstrokecerebrovasdis.2018.06.043
- 73 Chan J, Desai AK, Kazi ZB, *et al.* The emerging phenotype of late-onset Pompe disease: A systematic literature review. *Mol. Genet. Metab.* 2017;**120**:163–72. doi:10.1016/j.ymgme.2016.12.004
- 74 Young SP, Stevens RD, An Y, *et al.* Analysis of a glucose tetrasaccharide elevated in Pompe disease by stable isotope dilution-electrospray ionization tandem mass spectrometry. *Anal Biochem* 2003;**316**:175–80. doi:10.1016/S0003-2697(03)00056-3
- 75 Umapathysivam K, Whittle AM, Ranieri E, *et al.* Determination of acid  $\alpha$ -glucosidase protein: Evaluation as a screening marker for Pompe disease and other lysosomal storage disorders. *Clin Chem* 2000;**46**:1318–25.
- 76 Rattay TW, Rautenberg M, Söhn AS, *et al.* Defining diagnostic cutoffs in neurological patients for serum very long chain fatty acids (VLCFA) in genetically confirmed X-Adrenoleukodystrophy. *Sci Rep* 2020;**10**:1–12. doi:10.1038/s41598-020-71248-8
- 77 Mannari A, Wiggins B, Bachuwa G. Adult-Onset Cerebral Adrenoleukodystrophy Without Adrenal Gland Involvement. *Cureus* 2020;**12**. doi:10.7759/CUREUS.9813
- 78 Shamim D, Alleyne K. X-linked adult-onset adrenoleukodystrophy: Psychiatric and neurological manifestations. *SAGE Open Med Case Reports* 2017;**5**:2050313X1774100. doi:10.1177/2050313x17741009
- 79 Stepien KM, Wierzbicki AS, Poll-The BT, *et al.* The Challenges of a Successful Pregnancy in a Patient with Adult Refsum’s Disease due to Phytanoyl-CoA Hydroxylase Deficiency. *JIMD Rep* 2016;**33**:49–53. doi:10.1007/8904\_2016\_569
- 80 Bompaire F, Marcaud V, Trionnaire E Le, *et al.* Refsum Disease Presenting with a Late-Onset Leukodystrophy. *JIMD Rep* 2014;**19**:7–10. doi:10.1007/8904\_2014\_355
- 81 Wanders RJA, Komen J, Ferdinandusse S. Phytanic acid metabolism in health and disease. *Biochim. Biophys. Acta - Mol. Cell Biol. Lipids.* 2011;**1811**:498–507. doi:10.1016/j.bbalip.2011.06.006
- 82 Britton TC, Gibberd FB, Clemens ME, *et al.* The significance of plasma phytanic acid levels in adults. *J Neurol Neurosurg Psychiatry* 1989;**52**:891–4.



- doi:10.1136/jnnp.52.7.891
- 83 Smith EH, Gavrillov DK, Oglesbee D, *et al.* An adult onset case of alpha-methyl-acyl-CoA racemase deficiency. *J Inherit Metab Dis* 2010;**33**:349–53. doi:10.1007/S10545-010-9183-6
- 84 Kapina V, Sedel F, Truffert A, *et al.* RELAPSING RHABDOMYOLYSIS DUE TO PEROXISOMAL  $\alpha$ -METHYLACYL-COA RACEMASE DEFICIENCY. *Neurology* 2010;**75**:1300–2. doi:10.1212/WNL.0B013E3181F612A5
- 85 Clarke CE, Alger S, Preece MA, *et al.* Tremor and deep white matter changes in  $\alpha$ -methylacyl-CoA racemase deficiency. *Neurology* 2004;**63**:188–9. doi:10.1212/01.WNL.0000132841.81250.B7
- 86 McLean BN, Allen J, Ferdinandusse S, *et al.* A new defect of peroxisomal function involving pristanic acid: A case report. *J Neurol Neurosurg Psychiatry* 2002;**72**:396–9. doi:10.1136/jnnp.72.3.396
- 87 Ferdinandusse S, Denis S, Clayton PT, *et al.* Mutations in the gene encoding peroxisomal  $\alpha$ -methylacyl-CoA racemase cause adult-onset sensory motor neuropathy. *Nat Genet* 2000;**24**:188–91. doi:10.1038/72861
- 88 Osman C, Foulds N, Hunt D, *et al.* Diagnosis of pyridoxine-dependent epilepsy in an adult presenting with recurrent status epilepticus. *Epilepsia* 2020;**61**:e1–6. doi:10.1111/EPI.16408
- 89 Xue J, Wang J, Gong P, *et al.* Simultaneous quantification of alpha-amino adipic semialdehyde, piperidine-6-carboxylate, pipercolic acid and alpha-amino adipic acid in pyridoxine-dependent epilepsy. *Sci Rep* 2019;**9**:1–10. doi:10.1038/s41598-019-47882-2
- 90 Dahiphale R, Jain S, Agrawal M. Biotinidase deficiency. *Indian Pediatr* 2008;**45**:777–9. doi:10.1212/nxg.0000000000000525
- 91 Van Winckel G, Ballhausen D, Wolf B, *et al.* Severe Distal Motor Involvement in a Non-compliant Adult With Biotinidase Deficiency: The Necessity of Life-Long Biotin Therapy. *Front Neurol* 2020;**11**:1–5. doi:10.3389/fneur.2020.516799
- 92 Iseghem V Van, Sprengers M, Zaeytijd J De, *et al.* Biotinidase deficiency: A treatable cause of opticospinal syndrome in young. *Mult Scler Relat Disord* 2019;**32**:64–5. doi:10.1016/j.msard.2019.04.025
- 93 Wolf B. Biotinidase deficiency should be considered in individuals thought to have multiple sclerosis and related disorders. *Mult Scler Relat Disord* 2019;**28**:26–30. doi:10.1016/j.msard.2018.11.030
- 94 Deschamps R, Savatovsky J, Vignal C, *et al.* Adult-onset biotinidase deficiency: Two individuals with severe, but reversible optic neuropathy. *J. Neurol. Neurosurg. Psychiatry*. 2018;**89**:1009–10. doi:10.1136/jnnp-2017-316644
- 95 Yilmaz S, Serin M, Canda E, *et al.* A treatable cause of myelopathy and vision loss mimicking neuromyelitis optica spectrum disorder: late-onset biotinidase deficiency. *Metab Brain Dis* 2017;**32**:675–8. doi:10.1007/s11011-017-9984-5
- 96 Bottin L, Prud'homme S, Guey S, *et al.* Biotinidase deficiency mimicking neuromyelitis optica: Initially exhibiting symptoms in adulthood. *Mult Scler* 2015;**21**:1604–7. doi:10.1177/1352458515596457
- 97 Cowan TM, Blitzer MG, Wolf B. Technical standards and guidelines for the diagnosis

- of biotinidase deficiency. *Genet. Med.* 2010;**12**:464–70.  
doi:10.1097/GIM.0b013e3181e4cc0f
- 98 Lee J, Hegele RA. Abetalipoproteinemia and homozygous hypobetalipoproteinemia: a framework for diagnosis and management. *J Inherit Metab Dis* 2014;**37**:333–9.  
doi:10.1007/s10545-013-9665-4
- 99 Nagappa M, Bindu PS, Adwani S, *et al.* Clinical, hematological, and imaging observations in a 25-year-old woman with abetalipoproteinemia. *Ann Indian Acad Neurol* 2014;**17**:113. doi:10.4103/0972-2327.128574
- 100 Zamel R, Khan R, Pollex RL, *et al.* Abetalipoproteinemia: Two case reports and literature review. *Orphanet J Rare Dis* 2008;**3**:1–8. doi:10.1186/1750-1172-3-19
- 101 Euch-Fayache G El, Bouhlal Y, Amouri R, *et al.* Molecular, clinical and peripheral neuropathy study of Tunisian patients with ataxia with vitamin E deficiency. *Brain* 2014;**137**:402–10. doi:10.1093/brain/awt339
- 102 Cavalier L, Ouahchi K, Kayden HJ, *et al.* Ataxia with isolated vitamin E deficiency: Heterogeneity of mutations and phenotypic variability in a large number of families. *Am J Hum Genet* 1998;**62**:301–10. doi:10.1086/301699
- 103 Finckh B, Kontush A, Commentz J, *et al.* Monitoring of ubiquinol-10, ubiquinone-10, carotenoids, and tocopherols in neonatal plasma microsomes using high-performance liquid chromatography with coulometric electrochemical detection. *Anal Biochem* 1995;**232**:210–6. doi:10.1006/abio.1995.0009
- 104 Gotoda T, Arita M, Arai H, *et al.* Adult-Onset Spinocerebellar Dysfunction Caused by a Mutation in the Gene for the  $\alpha$ -Tocopherol-Transfer Protein. *N Engl J Med* 1995;**333**:1313–9. doi:10.1056/nejm199511163332003
- 105 Pope S, Artuch R, Heales S, *et al.* Cerebral folate deficiency: Analytical tests and differential diagnosis. *J Inherit Metab Dis* 2019;**42**:jjmd.12092.  
doi:10.1002/jimd.12092
- 106 Masingue M, Benoist JF, Roze E, *et al.* Cerebral folate deficiency in adults: A heterogeneous potentially treatable condition. *J Neurol Sci* 2019;**396**:112–8.  
doi:10.1016/j.jns.2018.11.014
- 107 Sadighi Z, Butler IJ, Koenig MK. Adult-onset cerebral folate deficiency. *Arch Neurol* 2012;**69**:778–9. doi:10.1001/archneurol.2011.3036
- 108 Tabarki B, Al-Shafi S, Al-Shahwan S, *et al.* Biotin-responsive basal ganglia disease revisited: Clinical, radiologic, and genetic findings. *Neurology*. 2013;**80**:261–7.  
doi:10.1212/WNL.0b013e31827deb4c
- 109 Kono S, Miyajima H, Yoshida K, *et al.* Mutations in a Thiamine-Transporter Gene and Wernicke's-like Encephalopathy. *N Engl J Med* 2009;**360**:1792–4.  
doi:10.1056/nejmc0809100
- 110 Carreau C, Benoit C, Ahle G, *et al.* Late-onset riboflavin transporter deficiency: A treatable mimic of various motor neuropathy aetiologies. *J Neurol Neurosurg Psychiatry* 2021;**92**:27–35. doi:10.1136/jnnp-2020-323304
- 111 Foley AR, Menezes MP, Pandraud A, *et al.* Treatable childhood neuronopathy caused by mutations in riboflavin transporter RFVT2. *Brain* 2014;**137**:44–56.  
doi:10.1093/brain/awt315
- 112 Leen WG, Wevers RA, Kamsteeg EJ, *et al.* Cerebrospinal fluid analysis in the workup

- of GLUT1 deficiency syndrome: A systematic review. *JAMA Neurol.* 2013;**70**:1440–4. doi:10.1001/jamaneurol.2013.3090
- 113 Afawi Z, Suls A, Ekstein D, *et al.* Mild adolescent/adult onset epilepsy and paroxysmal exercise-induced dyskinesia due to GLUT1 deficiency. *Epilepsia* 2010;**51**:2466–9. doi:10.1111/J.1528-1167.2010.02726.X
- 114 Veggiotti P, Teutonico F, Alfei E, *et al.* Glucose transporter type 1 deficiency: Ketogenic diet in three patients with atypical phenotype. *Brain Dev* 2010;**32**:404–8. doi:10.1016/J.BRAINDEV.2009.04.013
- 115 Pavlu-Pereira H, Silva MJ, Florindo C, *et al.* Pyruvate dehydrogenase complex deficiency: updating the clinical, metabolic and mutational landscapes in a cohort of Portuguese patients. *Orphanet J Rare Dis* 2020;**15**:298. doi:10.1186/s13023-020-01586-3
- 116 Rahman S, Clarke CF, Hirano M. 176th ENMC International Workshop: Diagnosis and treatment of coenzyme Q 10 deficiency. *Neuromuscul Disord* 2012;**22**:76–86. doi:10.1016/j.nmd.2011.05.001
- 117 Sedel F, Challe G, Mayer JM, *et al.* Thiamine responsive pyruvate dehydrogenase deficiency in an adult with peripheral neuropathy and optic neuropathy. *J. Neurol. Neurosurg. Psychiatry.* 2008;**79**:846–7. doi:10.1136/jnnp.2007.136630
- 118 Quinzii CM, Hirano M, DiMauro S. CoQ10 deficiency diseases in adults. *Mitochondrion* 2007;**7**:122–6. doi:10.1016/j.mito.2007.03.004
- 119 Mellick G, Price L, Boyle R. Late-onset presentation of pyruvate dehydrogenase deficiency. *Mov Disord* 2004;**19**:727–9. doi:10.1002/MDS.20063
- 120 Ogasahara S, Engel AG, Frens D, *et al.* Muscle coenzyme Q deficiency in familial mitochondrial encephalomyopathy. *Proc Natl Acad Sci* 1989;**86**:2379–82. doi:10.1073/PNAS.86.7.2379
- 121 Ciron J, Baron C, Boissonnot M, *et al.* Peripheral nervous system involvement in Leber’s hereditary optic neuropathy. *J Neurol Sci* 2018;**388**:94–6. doi:10.1016/J.JNS.2018.03.002
- 122 Carelli V, Carbonelli M, De Coo IF, *et al.* International consensus statement on the clinical and therapeutic management of leber hereditary optic neuropathy. *J Neuro-Ophthalmology* 2017;**37**:371–81. doi:10.1097/WNO.0000000000000570
- 123 Martikainen MH, Ng YS, Gorman GS, *et al.* Clinical, Genetic, and Radiological Features of Extrapyrmidal Movement Disorders in Mitochondrial Disease. *JAMA Neurol* 2016;**73**:668–74. doi:10.1001/JAMANEUROL.2016.0355
- 124 Pfeiffer G, Burke A, Yu-Wai-Man P, *et al.* Clinical features of MS associated with Leber hereditary optic neuropathy mtDNA mutations. *Neurology* 2013;**81**:2073–81. doi:10.1212/01.WNL.0000437308.22603.43
- 125 J P. Multiple sclerosis associated with Leber’s Hereditary Optic Neuropathy. *J Neurol Sci* 2009;**286**:24–7. doi:10.1016/J.JNS.2009.09.009
- 126 McFarland R, Chinnery PF, Blakely EL, *et al.* Homoplasmy, heteroplasmy, and mitochondrial dystonia. *Neurology* 2007;**69**:911–6. doi:10.1212/01.WNL.0000267843.10977.4A
- 127 Gilhuis HJ, Schelhaas HJ, Cruysberg JRM, *et al.* Demyelinating polyneuropathy in Leber hereditary optic neuropathy. *Neuromuscul Disord* 2006;**16**:394–5.

- doi:10.1016/J.NMD.2006.03.006
- 128 Horváth R, Abicht A, Shoubridge EA, *et al.* Leber's hereditary optic neuropathy presenting as multiple sclerosis-like disease of the CNS. *J Neurol* 2000 2471 2000;**247**:65–7. doi:10.1007/S004150050015
- 129 Nikoskelainen EK, Marttila RJ, Huoponen K, *et al.* Leber's 'plus': neurological abnormalities in patients with Leber's hereditary optic neuropathy. *J Neurol Neurosurg Psychiatry* 1995;**59**:160–4. doi:10.1136/JNPNP.59.2.160
- 130 Nadjar Y, Souvannanorath S, Maisonobe T, *et al.* Sensory neuronopathy as a major clinical feature of mitochondrial trifunctional protein deficiency in adults. *Rev Neurol (Paris)* 2020;**176**:380–6. doi:10.1016/j.neurol.2019.11.011
- 131 Chen W, Zhang Y, Ni Y, *et al.* Late-onset riboflavin-responsive multiple acyl-CoA dehydrogenase deficiency (MADD): Case reports and epidemiology of ETFDH gene mutations. *BMC Neurol* 2019;**19**:1–7. doi:10.1186/s12883-019-1562-5
- 132 Van Hove JLK, Zhang W, Kahler SG, *et al.* Medium-chain acyl-CoA dehydrogenase (MCAD) deficiency: Diagnosis by acylcarnitine analysis in blood. *Am J Hum Genet* 1993;**52**:958–66./pmc/articles/PMC1682046/?report=abstract (accessed 11 Mar 2021).
- 133 De Biase I, Viau KS, Liu A, *et al.* Diagnosis, treatment, and clinical outcome of patients with mitochondrial trifunctional protein/long-chain 3-hydroxy acyl-CoA dehydrogenase deficiency. In: *JIMD Reports*. Springer 2017. 63–71. doi:10.1007/8904\_2016\_558
- 134 Wang Z, Hong D, Zhang W, *et al.* Severe sensory neuropathy in patients with adult-onset multiple acyl-CoA dehydrogenase deficiency. *Neuromuscul Disord* 2016;**26**:170–5. doi:10.1016/J.NMD.2015.12.002
- 135 Grünert SC. Clinical and genetical heterogeneity of late-onset multiple acyl-coenzyme A dehydrogenase deficiency. *Orphanet J Rare Dis* 2014;**9**:1–8. doi:10.1186/s13023-014-0117-5
- 136 Rosenbohm A, Süßmuth SD, Kassubek J, *et al.* Novel ETFDH mutation and imaging findings in an adult with glutaric aciduria type II. *Muscle Nerve* 2014;**49**:446–50. doi:10.1002/MUS.23979
- 137 Liewluck T, Mundi MS, Mauermann ML. Mitochondrial trifunctional protein deficiency: a rare cause of adult-onset rhabdomyolysis. *Muscle Nerve* 2013;**48**:989–91. doi:10.1002/mus.23959
- 138 Schatz UA, Ensenauer R. The clinical manifestation of MCAD deficiency: Challenges towards adulthood in the screened population. *J. Inherit. Metab. Dis.* 2010;**33**:513–20. doi:10.1007/s10545-010-9115-5
- 139 Lang TF. Adult presentations of medium-chain acyl-CoA dehydrogenase deficiency (MCADD). *J. Inherit. Metab. Dis.* 2009;**32**:675–83. doi:10.1007/s10545-009-1202-0
- 140 Abdenur JE, Chamoles NA, Schenone AB, *et al.* Multiple acyl-CoA-dehydrogenase deficiency (MADD): Use of acylcarnitines and fatty acids to monitor the response to dietary treatment. *Pediatr Res* 2001;**50**:61–6. doi:10.1203/00006450-200107000-00013
- 141 Li LY, Zhu XQ, Tao WW, *et al.* Acute onset neurological symptoms in Wilson disease after traumatic, surgical or emotional events: A cross-sectional study. *Med (United*

- States) 2019;**98**. doi:10.1097/MD.00000000000015917
- 142 Guillaud O, Brunet A-S, Mallet I, *et al*. Relative exchangeable copper: A valuable tool for the diagnosis of Wilson disease. *Liver Int* 2018;**38**:350–7. doi:10.1111/liv.13520
- 143 Bandmann O, Weiss KH, Kaler SG. Wilson's disease and other neurological copper disorders. *Lancet Neurol* 2015;**14**:103–13. doi:10.1016/S1474-4422(14)70190-5
- 144 Roberts EA, Schilsky ML. Diagnosis and treatment of Wilson disease: An update. *Hepatology*. 2008;**47**:2089–111. doi:10.1002/hep.22261
- 145 Ferenci P, Członkowska A, Merle U, *et al*. Late-Onset Wilson's Disease. *Gastroenterology* 2007;**132**:1294–8. doi:10.1053/J.GASTRO.2007.02.057
- 146 Marchi G, Busti F, Zidanes AL, *et al*. Aceruloplasminemia: A Severe Neurodegenerative Disorder Deserving an Early Diagnosis. *Front Neurosci* 2019;**13**. doi:10.3389/FNINS.2019.00325
- 147 Kono S. Aceruloplasminemia. *Curr Drug Targets* 2012;**13**:1190–9. doi:10.2174/138945012802002320
- 148 Quadri M, Federico A, Zhao T, *et al*. Mutations in SLC30A10 cause parkinsonism and dystonia with hypermanganesemia, polycythemia, and chronic liver disease. *Am J Hum Genet* 2012;**90**:467–77. doi:10.1016/j.ajhg.2012.01.017
- 149 Tuschl K, Clayton PT, Gospe SM, *et al*. Syndrome of hepatic cirrhosis, dystonia, polycythemia, and hypermanganesemia caused by mutations in SLC30A10, a manganese transporter in man. *Am J Hum Genet* 2012;**90**:457–66. doi:10.1016/j.ajhg.2012.01.018
- 150 Gospe J, Caruso RD, Clegg MS, *et al*. Paraparesis, hypermanganesaemia, and polycythaemia: A novel presentation of cirrhosis. *Arch Dis Child* 2000;**83**:439–42. doi:10.1136/adc.83.5.439
- 151 Makary MS, Kisanuki YY, Amin NN, *et al*. Teaching NeuroImages: Cerebrotendinous xanthomatosis. *Neurology*. 2018;**90**:e637–8. doi:10.1212/WNL.0000000000004967
- 152 Sasamura A, Akazawa S, Haraguchi A, *et al*. Late-onset cerebrotendinous xanthomatosis with a novel mutation in the CYP27A1 gene. *Intern Med* 2018;**57**:1611–6. doi:10.2169/internalmedicine.0120-17
- 153 Degos B, Nadjar Y, Amador M, *et al*. Natural history of cerebrotendinous xanthomatosis : a paediatric disease diagnosed in adulthood. *Orphanet J Rare Dis* 2016;:1–4. doi:10.1186/s13023-016-0419-x
- 154 Nakashima N, Sakai Y, Sakai H, *et al*. A point mutation in the bile acid biosynthetic enzyme sterol 27- hydroxylase in a family with cerebrotendinous xanthomatosis. *J Lipid Res* 1994;**35**:663–8. doi:10.1016/s0022-2275(20)41180-0
- 155 Leitersdorf E, Reshef A, Meiner V, *et al*. Frameshift and splice-junction mutations in the sterol 27-hydroxylase gene cause cerebrotendinous xanthomatosis in Jews of Moroccan origin. *J Clin Invest* 1993;**91**:2488–96. doi:10.1172/JCI116484
- 156 Simon A, Pompilus F, Querbes W, *et al*. Patient Perspective on Acute Intermittent Porphyria with Frequent Attacks : A Disease with Intermittent and Chronic Manifestations. *Patient - Patient-Centered Outcomes Res* Published Online First: 2018. doi:10.1007/s40271-018-0319-3
- 157 Kevelam SH, Neeleman RA, Waisfisz Q, *et al*. Acute intermittent porphyria-related leukoencephalopathy. *Neurology* 2016;**87**:1258–65.

- doi:10.1212/WNL.0000000000003129
- 158 Bonkovsky HL, Maddukuri VC, Yazici C, *et al.* Acute Porphyrrias in the USA: Features of 108 Subjects from Porphyrrias Consortium. *Am J Med* 2014;**127**:1233–41.  
doi:10.1016/J.AMJMED.2014.06.036
- 159 Puy H, Gouya L, Deybach JC. Porphyrrias. *Lancet* 2010;**375**:924–37.  
doi:10.1016/S0140-6736(09)61925-5
- 160 Hooper AJ, Hegele RA, Burnett JR. Tangier disease. *Curr Opin Lipidol* 2020;**31**:80–4.  
doi:10.1097/MOL.0000000000000669
- 161 Mercan M, Yayla V, Altinay S, *et al.* Peripheral neuropathy in Tangier disease: A literature review and assessment. *J Peripher Nerv Syst* 2018;**23**:88–98.  
doi:10.1111/jns.12265
